1 **Deleterious, protein-altering variants in the X-linked transcriptional coregulator**  
2 **ZMYM3 in 22 individuals with a neurodevelopmental delay phenotype**

3  
4 Susan M. Hiatt,<sup>1\*</sup> Slavica Trajkova,<sup>2</sup> Matteo Rossi Sebastiano,<sup>3</sup> E. Christopher  
5 Partridge,<sup>1</sup> Fatima E. Abidi,<sup>4</sup> Ashlyn Anderson,<sup>1</sup> Muhammad Ansar,<sup>5</sup> Stylianos E.  
6 Antonarakis,<sup>6</sup> Azadeh Azadi,<sup>7</sup> Ruxandra Bachmann-Gagescu,<sup>8</sup> Andrea Bartuli,<sup>9</sup> Caroline  
7 Benech,<sup>10</sup> Jennifer L. Berkowitz,<sup>11</sup> Michael J. Betti,<sup>12</sup> Alfredo Brusco,<sup>2</sup> Ashley Cannon,<sup>13</sup>  
8 Giulia Caron,<sup>14</sup> Yanmin Chen,<sup>11</sup> Molly M. Crenshaw,<sup>15</sup> Laurence Cuisset,<sup>16</sup> Cynthia J.  
9 Curry,<sup>17</sup> Hossein Darvish,<sup>18</sup> Serwet Demirdas,<sup>19</sup> Maria Descartes,<sup>13</sup> Jessica Douglas,<sup>20</sup>  
10 David A. Dymant,<sup>21</sup> Houda Zghal Elloumi,<sup>11</sup> Giuseppe Ermondi,<sup>14</sup> Marie Faoucher,<sup>22</sup>  
11 Emily G. Farrow,<sup>23</sup> Stephanie A. Felker,<sup>1</sup> Heather Fisher,<sup>24</sup> Anna C. E. Hurst,<sup>13</sup> Pascal  
12 Joset,<sup>25</sup> Stanislav Knoch,<sup>26,27</sup> Benjamin R. Leadem,<sup>11</sup> Marina Macchiaiolo,<sup>28</sup> Martin  
13 Magner,<sup>27</sup> Giorgia Mandrile,<sup>29</sup> Francesca Mattioli,<sup>30</sup> Megan McEown,<sup>1</sup> Sarah K.  
14 Meadows,<sup>1</sup> Livija Medne,<sup>31</sup> Naomi J. L. Meeks,<sup>32</sup> Sarah Montgomery,<sup>33</sup> Melanie P.  
15 Napier,<sup>11</sup> Marvin Natowicz,<sup>34</sup> Kimberly M. Newberry,<sup>1</sup> Marcello Niceta,<sup>28</sup> Lenka  
16 Noskova,<sup>26</sup> Catherine Nowak,<sup>20</sup> Amanda G. Noyes,<sup>11</sup> Matthew Osmond,<sup>21</sup> Verdiana  
17 Pullano,<sup>2</sup> Chloé Quélin,<sup>35</sup> Simin Rahimi-Aliabadi,<sup>36</sup> Anita Rauch,<sup>8,37</sup> Sylvia Redon,<sup>10,38,39</sup>  
18 Alexandre Reymond,<sup>30</sup> Caitlin R. Schwager,<sup>40</sup> Elizabeth A. Sellars,<sup>41</sup> Angela  
19 Scheuerle,<sup>42</sup> Elena Shukarova-Angelovska,<sup>43</sup> Cara Skraban,<sup>31</sup> Bonnie R. Sullivan,<sup>40</sup>  
20 Marco Tartaglia,<sup>28</sup> Isabelle Thiffault,<sup>23</sup> Kevin Uguen,<sup>10,38,39</sup> Luis A. Umaña,<sup>42</sup> Yolande  
21 van Bever,<sup>19</sup> Saskia N. van der Crabben,<sup>44</sup> Marjon A. van Slegtenhorst,<sup>19</sup> Quinten  
22 Waisfisz,<sup>45,46</sup> Richard M. Myers,<sup>1</sup> Gregory M. Cooper,<sup>1\*</sup>

23  
24 <sup>1</sup>HudsonAlpha Institute for Biotechnology, Huntsville, AL, 35806, USA

25 <sup>2</sup>Department of Medical Sciences, University of Torino, 10126 Torino, Italy

26 <sup>3</sup>Molecular Biotechnology and Health Sciences Dept., Università degli Studi di Torino,  
27 via Quarellino 15, 10135 Torino, Italy

28 <sup>4</sup>Molecular Diagnostic Laboratory, Greenwood Genetic Center, Greenwood, SC, 29646,  
29 USA

30 <sup>5</sup>University of Lausanne, Jules Gonin Eye Hospital, Fondation Asile des Aveugles,  
31 Lausanne, Switzerland

32 <sup>6</sup>Department of Genetic Medicine and Development, University of Geneva, Switzerland

33 <sup>7</sup>Obstetrics and Gynecology Department, Golestan University of Medical Sciences,  
34 Gorgan, Iran

35 <sup>8</sup>Institute of Medical Genetics, University of Zurich, Schlieren 8952, Switzerland

36 <sup>9</sup>Rare Diseases and Medical Genetics Unit, Bambino Gesù Children's Hospital, IRCCS,  
37 Rome, Italy

38 <sup>10</sup>Univ Brest, Inserm, EFS, UMR 1078, GGB, F-29200 Brest, France

39 <sup>11</sup>GeneDx, LLC, Gaithersburg, MD, 20877, USA

40 <sup>12</sup>Vanderbilt University Medical Center, Nashville, TN, 37232, USA

41 <sup>13</sup>Department of Genetics, University of Alabama at Birmingham, Birmingham, AL, USA

42 <sup>14</sup>Molecular Biotechnology and Health Sciences Dept., Università degli Studi di Torino,  
43 via Quarellino 15, 10135 Torino, Italy

44 <sup>15</sup>Pediatrics and Medical Genetics, University of Colorado, Aurora CO, USA

- 45 <sup>16</sup>Service de Médecine Génomique des Maladies de Système et d'Organe,  
46 Département Médico-Universitaire BioPhyGen, Hôpital Cochin, APHP, Université Paris  
47 Cité, Paris, France
- 48 <sup>17</sup>Genetic Medicine, UCSF/Fresno, Fresno, CA, 93701, USA
- 49 <sup>18</sup>Neuroscience Research Center, Faculty of Medicine, Golestan University of Medical  
50 Sciences, Gorgan, Iran; Nikagene Genetic Diagnostic Laboratory, Gorgan, Golestan,  
51 Iran
- 52 <sup>19</sup>Department of Clinical Genetics, Erasmus MC University Medical Center, Rotterdam,  
53 The Netherlands
- 54 <sup>20</sup>Boston Children's, Boston, MA, USA
- 55 <sup>21</sup>Children's Hospital of Eastern Ontario Research Institute, Ottawa, Ontario, Canada
- 56 <sup>22</sup>Service de Génétique Moléculaire et Génomique, CHU, Rennes, F-35033, France;  
57 Univ Rennes, CNRS, IGDR, UMR 6290, Rennes, F-35000, France
- 58 <sup>23</sup>Children's Mercy Kansas City, Center for Pediatric Genomic Medicine, Kansas City,  
59 KS, USA
- 60 <sup>24</sup>Children's Medical Center, Dallas TX, USA
- 61 <sup>25</sup>Medical Genetics, Institute of Medical Genetics and Pathology, University Hospital  
62 Basel, Basel, Switzerland
- 63 <sup>26</sup>Research Unit for Rare Diseases, 1st Faculty of Medicine, Charles University in  
64 Prague, Czech Republic
- 65 <sup>27</sup>Department of Pediatrics and Inherited Metabolic Disorders, 1st Faculty of Medicine,  
66 Charles University in Prague, Czech Republic
- 67 <sup>28</sup>Genetics and Rare Diseases Research Division, Ospedale Pediatrico Bambino Gesù,  
68 IRCCS, 00146, Rome, Italy.
- 69 <sup>29</sup>Medical Genetics Unit and Thalassemia Center, San Luigi University Hospital,  
70 University of Torino, Orbassano, Italy
- 71 <sup>30</sup>Center for Integrative Genomics, University of Lausanne, Lausanne, Switzerland
- 72 <sup>31</sup>Children's Hospital of Philadelphia, Philadelphia PA, USA
- 73 <sup>32</sup>Section of Genetics & Metabolism, Department of Pediatrics, University of Colorado  
74 Anschutz Medical Campus, Aurora, CO 80045
- 75 <sup>33</sup>Division of Genetics and Metabolism, Children's Health, Dallas, TX, USA
- 76 <sup>34</sup>Pathology & Laboratory Medicine, Genomic Medicine, Neurological and Pediatrics  
77 Institutes, Cleveland Clinic, Cleveland, OH, USA
- 78 <sup>35</sup>Service de Génétique Clinique, Centre de Référence Maladies Rares CLAD-Ouest,  
79 CHU Hôpital Sud, Rennes, France
- 80 <sup>36</sup>Department of Pharmacology and Toxicology, College of Pharmacy, University of  
81 Utah, Salt Lake City, UT 84112, USA
- 82 <sup>37</sup>University Children's Hospital Zurich, University of Zurich, Zurich 8032, Switzerland
- 83 <sup>38</sup>Service de Génétique Médicale et Biologie de la Reproduction, CHU de Brest, France
- 84 <sup>39</sup>Centre de Référence Déficiences Intellectuelles de causes rares, Brest, France
- 85 <sup>40</sup>Division of Genetics, Children's Mercy Kansas City, Kansas City, MO
- 86 <sup>41</sup>Genetics and Metabolism, Arkansas Children's Hospital, Little Rock, AR, 72202, USA
- 87 <sup>42</sup>Department of Pediatrics, Division of Genetics and Metabolism, University of Texas  
88 Southwestern Medical Center, Dallas TX, USA
- 89 <sup>43</sup>Department of Endocrinology and Genetics, University Clinic for Children's Diseases,  
90 Medical Faculty, University Sv. Kiril i Metodij, Skopje, Republic of Macedonia

91 <sup>44</sup>Amsterdam University Medical Centers, Department of Clinical Genetics, Amsterdam,  
92 The Netherlands

93 <sup>45</sup>Department of Human Genetics, Amsterdam University Medical Centers, VU  
94 University Amsterdam

95 <sup>46</sup>Amsterdam Neuroscience, Amsterdam, The Netherlands

96  
97

98

99

100

101

102

103

104 \*Correspondence:

105 Susan M. Hiatt, Gregory M. Cooper

106 [shiatt@hudsonalpha.org](mailto:shiatt@hudsonalpha.org); [gcooper@hudsonalpha.org](mailto:gcooper@hudsonalpha.org)

107

108

109 **Key Words**

110 *ZMYM3*, X-linked intellectual disability; neurodevelopmental disorder; transcriptional

111 coregulators; chromatin modifiers;

112

113 **ABSTRACT**

114 Neurodevelopmental disorders (NDDs) often result from highly penetrant variation in  
115 one of many genes, including genes not yet characterized. Using the MatchMaker  
116 Exchange, we assembled a cohort of 22 individuals with rare, protein-altering variation  
117 in the X-linked transcriptional coregulator gene *ZMYM3*. Most (n=19) individuals were  
118 males; 15 males had maternally-inherited alleles, three of the variants in males arose *de*  
119 *novo*, and one had unknown inheritance. Overlapping features included developmental  
120 delay, intellectual disability, behavioral abnormalities, and a specific facial gestalt in a  
121 subset of males. Variants in almost all individuals (n=21) are missense, two of which are  
122 recurrent. Three unrelated males were identified with inherited variation at R441, a site  
123 at which variation has been previously reported in NDD-affected males, and two  
124 individuals have *de novo* variation at R1294. All variants affect evolutionarily conserved  
125 sites, and most are predicted to damage protein structure or function. *ZMYM3* is  
126 relatively intolerant to variation in the general population, is highly expressed in the  
127 brain, and encodes a component of the KDM1A-RCOR1 chromatin-modifying complex.  
128 ChIP-seq experiments on one mutant, *ZMYM3*<sup>R1274W</sup>, indicate dramatically reduced  
129 genomic occupancy, supporting a hypomorphic effect. While we are unable to perform  
130 statistical evaluations to support a conclusive causative role for variation in *ZMYM3* in  
131 disease, the totality of the evidence, including the presence of recurrent variation,  
132 overlapping phenotypic features, protein-modeling data, evolutionary constraint, and  
133 experimentally-confirmed functional effects, strongly supports *ZMYM3* as a novel NDD  
134 gene.

135

136

## 137 **INTRODUCTION**

138 Neurodevelopmental disorders (NDD) as a group affect 1-3% of children, but individual  
139 NDDs are typically rare and often result from highly penetrant genetic variation affecting  
140 one of many NDD-associated loci<sup>1,2</sup>. While exome/genome sequencing tests have  
141 provided molecular diagnoses for many individuals, the diagnostic yield of NDDs with  
142 these tests remains below 50%<sup>3</sup>. Various hypotheses exist to explain this diagnostic  
143 limitation, one of which is that many NDD-associated genes have yet to be identified.  
144 The wide availability of sequencing tests, coupled with data sharing, has allowed  
145 identification of many new NDD genes over the last few years<sup>4</sup>.

146 X-linked intellectual disability (XLID) is a subset of NDDs that accounts for a  
147 portion of the observed increased ratio of male to female probands with NDDs<sup>5</sup>.  
148 However, it can be difficult to separate pathogenic and benign variation on the X  
149 chromosome since many pathogenic XLID variants are inherited from unaffected  
150 heterozygous mothers<sup>6,7</sup>. For autosomal dominant ID genes, in contrast, pathogenic  
151 variation frequently arises *de novo*, and this fact can be used for both robust  
152 quantification of global disease enrichments and as a key piece of evidence for clinical  
153 interpretation of individual variants<sup>8</sup>. Despite this, data from large sequence databases  
154 such as gnomAD<sup>9</sup> and TopMed/BRAVO (<https://bravo.sph.umich.edu/freeze8/hg38/>) do  
155 provide critical frequency data from control populations to support (or refute) new XLID  
156 associations<sup>6</sup>.

157 *ZMYM3* (MIM: 300061) lies on the X chromosome and encodes a member of a  
158 transcriptional corepressor complex that includes HDAC1, RCOR1, and KDM1A<sup>10,11</sup>.

159 *ZMYM3* was originally identified as an XLID candidate gene in a female with a balanced  
160 X;13 translocation affecting the 5' UTR of one isoform of *ZMYM3*<sup>12</sup>. The proband  
161 presented with ID, scoliosis, spotty abdominal hypopigmentation, slight facial  
162 asymmetry, clinodactyly, and history of a possible febrile seizure at age one year.  
163 Additionally, Philips, *et al.* reported a family with three NDD-affected brothers carrying a  
164 missense variant in *ZMYM3* (R441W)<sup>13</sup>. The brothers displayed developmental delay, a  
165 sleeping disorder, microcephaly, genitourinary anomalies and facial dysmorphism.

166         Given the extremely low prevalence for any given Mendelian NDD, data sharing  
167 to facilitate cohort building is essential and has had a large impact on rare disease gene  
168 discovery over the last decade<sup>14</sup>. Here we describe a cohort of individuals with rare  
169 variants in *ZMYM3*, assembled from submissions to GeneMatcher<sup>15</sup> and  
170 PhenomeCentral<sup>16</sup>. We provide strong evidence for an X-linked, *ZMYM3*-associated  
171 NDD based on phenotypic, computational, and experimental analysis of variants  
172 observed in 22 individuals.

## 173 174 **SUBJECTS AND METHODS**

175         *ZMYM3* was submitted to GeneMatcher (<https://genematcher.org/>) by  
176 HudsonAlpha in 2018, and follow-up discussion of cases from either research studies or  
177 clinical sequencing was performed via email over the course of four years. Some  
178 matches originated from GeneMatcher<sup>15</sup>, while others originated from  
179 PhenomeCentral<sup>16</sup>. Over the course of the collaboration, some affected individuals were  
180 excluded from the cohort due to segregation of the variant of interest in unaffected male  
181 family members, including individuals harboring R688H, a variant that was initially  
182 identified as a VUS but later reclassified to likely benign after observation in an

183 unaffected male relative. Additionally, one of the individuals with R688H variation did  
184 not have a phenotype that was similar to those described here; he had normocephaly,  
185 ID, autism, developmental regression and facial dysmorphism dissimilar to those  
186 described here.

187 Approval for human subject research was obtained from all local ethics review  
188 boards, and informed consent for publication (including photos, where applicable) was  
189 obtained at individual sites. Exome sequencing (ES), genome sequencing (GS), or  
190 panel testing was performed as described in Supplemental Materials and Methods.

191 For protein modeling, the wild-type 3D protein structure was downloaded from  
192 AlphaFoldDB (<https://alphafold.ebi.ac.uk/>)<sup>17</sup>, which was included with the reference from  
193 UniProt (Accession number: Q14202). When not possible online, structures were  
194 visualized, colored, and the sequence was mutated with Chimera version 1.15, rotamer  
195 builder tool<sup>18</sup>. Structure superposition was obtained in Chimera with the tool  
196 Matchmaker. Structure refinement was performed with the Chimera tool Dock Prep with  
197 standard settings, as previously described<sup>19</sup>. Depiction of molecular surfaces was  
198 defined as VdW surface and colored according to the electrostatic potential. For  
199 additional analyses, see Supplemental Materials and Methods.

200 For CHIP-seq experiments, we edited the genomic DNA at the *ZMYM3*  
201 endogenous locus in HepG2 cells to introduce the variant (the “variant” experiment) or  
202 to reintroduce the reference sequence (the “control” experiment), simultaneously with a  
203 3X FLAG tag, 2A self-cleaving peptide, and neomycin resistance gene, using a modified  
204 version of the previously published CRISPR epitope tagging CHIP-seq (CETCh-seq)  
205 protocol<sup>20</sup>. We nucleofected cells and selected for correctly edited cells using neomycin,



206 confirmed edits by PCR and Sanger sequencing of genomic DNA, and performed ChIP-  
207 seq as previously described<sup>21</sup> with duplicate experiments for each condition (see  
208 Supplemental Materials and Methods). We performed peak calling using SPP<sup>22</sup> and  
209 Irreproducible Discovery Rate (IDR)<sup>23</sup>, using ENCODE-standardized pipelines for  
210 analysis and quality-control<sup>24</sup>. We performed additional differential binding analyses  
211 using the R package csaw v1.28.0<sup>25</sup>.

212 As an additional control, we used the standard CETCh-seq ZMYM3 experiment  
213 in HepG2 available on the ENCODE portal (ENCSR505DVB), with these data  
214 processed to match (i.e., downsampled to 20M reads) the other CETCh-seq  
215 experiments described here. See Supplemental Materials and Methods for additional  
216 details.

217

## 218 **RESULTS**

### 219 **ZMYM3 Variants**

220 Through a collaboration facilitated by the MatchMaker Exchange<sup>14</sup>, we identified  
221 17 unique variants in *ZMYM3* in 22 affected individuals from 20 unrelated families  
222 (Figure 1, Table 1). All observed variants had high CADD scores (average 24.2, range  
223 19-32, Table S1), indicating that they rank among the most deleterious SNVs in the  
224 human reference assembly, similar to most known highly penetrant NDD-associated  
225 variants<sup>26</sup>.

226 Nineteen of these 22 individuals are males that harbor hemizygous missense  
227 variants, including two sets of affected brothers. For the majority of males (n=15),  
228 variants were inherited from heterozygous carrier mothers. In three males, the *ZMYM3*



229 variant arose *de novo*, while inheritance could not be defined for one. All variants were  
230 rare, with three or fewer total alleles and no hemizygous males or homozygous females  
231 in gnomAD<sup>9</sup> or TopMed/Bravo (<https://bravo.sph.umich.edu/freeze8/hg38/>)(Table S1).

232 In addition, we identified three heterozygous *ZMYM3* variants in three unrelated,  
233 affected females (Figure 1, Table 1). All three variants are absent from population  
234 databases. Two of these variants arose *de novo*, while one was inherited from an  
235 apparently unaffected mother. In two of the three females, X-inactivation testing  
236 targeting either the *AR* locus<sup>27</sup> or the *RP2* locus<sup>28</sup> was performed, and in both, skewed  
237 X-inactivation was observed. In the case of the maternally-inherited L226WfsX8 variant,  
238 >94% skewing was observed in both the proband and her unaffected, heterozygous  
239 mother at the *RP2* locus. Both mother and daughter were heterozygous for two *RP2*  
240 alleles (366/362), and in both, the 366 allele was inactivated (see Supplemental Note:  
241 Case Reports for additional details). In Individual 20, a female carrying a *de novo*  
242 R1294C variant, 97% skewing at the *AR* locus was observed. Skewing of the precise  
243 *ZMYM3* alleles was not tested in these individuals.

244

## 245 **Phenotypic Characterization**

246 Of the nineteen identified males, one died at 26 weeks gestational age with a *de*  
247 *novo* variant in *ZMYM3* (R1294C) and a very severe phenotype (Supplemental Note:  
248 Case Reports). For this reason, we did not include this male in further phenotypic  
249 comparisons. Of the remaining 18 affected males, all were reported to have  
250 developmental delay (18/18), with speech delay (18/18) being more prominent than  
251 motor delay (13/18)(Table 1, Supplemental Note: Case Reports). Of those who could be

252 assessed, 13/15 showed intellectual disability, and most were diagnosed with autism or  
253 were reported to have autistic traits (11/16). The majority of males had behavioral  
254 concerns at some point in development (15/18). Almost all affected males were also  
255 reported to have at least mild facial dysmorphism (14/18), some of which were highly  
256 similar to the individuals reported in Philips, *et al.*<sup>13</sup>(Figure 2). Similarities include thick  
257 eyebrows, deeply set eyes, long palpebral fissures, protruding ears, and a high anterior  
258 hairline. Other variable features include genitourinary anomalies (9 individuals), short  
259 stature (4), microcephaly (4), scoliosis/kyphosis (4), and functional gastrointestinal  
260 problems (5) (Table 1). See Supplemental Note: Case Reports for additional clinical  
261 features for each case.

262 While most variants in males were inherited from unaffected heterozygous carrier  
263 mothers (9/13 mothers), the remaining four heterozygous mothers were reported to  
264 have a history of learning disabilities, attention deficit-hyperactivity disorder (ADHD), or  
265 dyslexia (Table 1, Supplemental Note: Case Reports, Figure S1).

266 Among the affected females, all three displayed developmental delay and some  
267 facial dysmorphism, but many of their additional features were variable and do not lead  
268 to a clear syndromic picture (Table 1, Figure 2, Supplemental Note: Case Reports).

269

## 270 **Protein Modeling**

271 *ZMYM3* encodes a DNA-binding transcriptional coregulator with multiple  
272 protein isoforms, the longest of which is 1370 amino acids (Q14202, NP\_005087.1).  
273 This isoform has nine MYM-type zinc fingers, a proline-rich region, and a C-terminal  
274 Cre-Like domain (Figure 1). As most of the observed variants are missense (16/17

275 unique variants), we performed computational modeling to assess the potential effects  
276 of these changes. Homology-based protein modeling using AlphaFold<sup>17</sup> indicates that  
277 13 of the 16 missense variants lie in ordered regions, and the majority have  
278 intermediate to high predicted Local Distance Difference Test (pLDDT) scores<sup>29</sup>,  
279 indicating that there is a moderate to high degree of confidence in further computational  
280 predictions (Figure 3, Figure S2, Table S2).

281 We assessed flexibility, stability, solvent exposure, and deformation energy of  
282 the mutant protein models (Figures S3-S6). A general trend towards protein  
283 destabilization (negative folding energy differential) was observed for several mutants,  
284 while R1274W was predicted to be stabilizing (Figure S3). We observed patterns  
285 somewhat consistent with solvent exposure across the 16 unique missense variants  
286 (Table S2). Six of the seven variants leading to the highest destabilization (R441Q,  
287 E731D, Y752C, R1124Q, Y1137N, M1213T) represent buried residues in high  
288 confidence regions of the protein. While disruption of each of these rigid residues is  
289 predicted to be destabilizing, some are due to likely increased flexibility (E731D, Y752C,  
290 Y1137N) while others are predicted to be more rigid (R441Q, R1124Q, M1213T). This  
291 result is consistent with the observation that substitutions of amino acids within the  
292 protein core are often associated with folding destabilization.

293 Conversely, the remaining 10 variants are exposed residues; six of these lie in  
294 low confidence regions or have very low pLDDT values (D69N, E241K, R302H, R395S,  
295 P398S, R1274W). These wild type residues are predicted to be flexible, and in most  
296 cases the observed mutation is predicted to lead to a more rigid structure. The  
297 remaining four residues represent rigid residues that have varying predicted deleterious

298 effects. More detailed surface analyses indicated that several variants result in  
299 significant changes of polarity, charge, and hydrophobicity (Table S2, Figure S6). In  
300 particular, R1274W is predicted to have major effects, resulting in stabilization of an  
301 exposed residue through the substitution of a polar, charged and flexible arginine with a  
302 neutral, aromatic and hydrophobic tryptophan moiety (Figure S6).

303 In addition to structural analysis, we submitted the sequences to the Eukaryotic  
304 Linear Motif (ELM)<sup>30</sup>. This resource predicts short amino acid motifs either bound by  
305 other proteins, or sites of post-translational modifications (phosphorylation, cleavage  
306 sites, ubiquitination, etc.). Intersecting this information with the position of our mutations  
307 suggests that several of the variants alter motifs (Table S2, Table S3) and that  
308 modifications of residues R302, V1202, M1213, R1274, and M1343 are predicted to  
309 possibly disrupt multiple interactions.

310

### 311 **Genome-wide occupancy of selected ZMYM3 variant transcription factors**

312 A key role of ZMYM3 is to function as a component of the KDM1A/RCOR1  
313 chromatin-modifying complex that regulates gene expression<sup>10</sup>. Therefore, we sought to  
314 measure the impact of variation on ZMYM3 activities genome-wide. Given the time and  
315 expense of these experiments, we chose three variants for testing: R441W, a previously  
316 reported variant<sup>13</sup> that affects a residue where we have seen recurrent variation  
317 (R441Q); R1274W, a *de novo* variant within the Cre-like domain that was found in an  
318 individual with notable facial similarities to those individuals with R441 variation; and  
319 R688H, which early in our collaboration appeared to be a recurrent variant seen in two  
320 affected individuals. Subsequently, segregation studies in one family indicated that the

321 R688H variant was present in an unaffected maternal uncle, suggesting that it is likely  
322 benign.

323 For each of these, we introduced the variant into the *ZMYM3* gene in the  
324 genomic DNA of cultured HepG2 cells using a modified version of the CRISPR epitope  
325 tagging ChIP-seq (CETCh-seq) protocol<sup>20</sup>; CETCh-seq uses an active Cas9 double-  
326 stranded DNA cleavage followed by homology-directed repair with an introduced donor  
327 template. In these experiments, we simultaneously introduced a “super-exon” consisting  
328 of all exons of *ZMYM3* downstream (relative to coding direction) of the exon in which  
329 the variant resides, along with a FLAG epitope tag and selectable resistance gene.  
330 These modifications result in cells that express the *ZMYM3* protein with the variant  
331 residue and a carboxyl-terminus FLAG tag for immunoprecipitation, as well as a  
332 neomycin resistance gene product for selection (cells that survive selection contain an  
333 in-frame insertion of the neomycin resistance gene that is driven by the endogenous  
334 *ZMYM3* promoter and indicates the transcription of in-frame *ZMYM3* with the FLAG  
335 tag). As a control for each super-exon edit, we performed the same protocol on cells but  
336 reintroduced the reference sequence in the super-exon along with the FLAG tag and  
337 resistance gene. In both the control and variant experiments, an additional single base  
338 substitution was introduced, located in the Protospacer Adjacent Motif (PAM) for the  
339 single guide RNA (sgRNA) used in the CRISPR editing, in order to abolish Cas9  
340 cleavage after cells are correctly edited. The PAM mutation was either synonymous (for  
341 the *ZMYM3*<sup>R688H</sup> and *ZMYM3*<sup>R441W</sup> constructs) or intronic (for the *ZMYM3*<sup>R1274W</sup>  
342 construct). The genomic DNA modifications were confirmed by PCR amplification and  
343 Sanger sequencing. The key advantage of this approach is that the control and variant

344 ZMYM3 proteins are produced from the endogenous genomic loci, each modified by the  
345 same super-exon, and that the antibody used (along with other experimental and  
346 analytical steps) is the same; the only difference between the variant and control  
347 experiments is the presence of the missense variant of interest. For both R688H and  
348 R1274W, we successfully obtained correctly edited cells; however, for R441W, we were  
349 unable to obtain edited cells. For both R688H and R1274W, we performed chromatin  
350 immunoprecipitation followed by high-throughput sequencing (ChIP-seq) and peak  
351 calling as previously described<sup>21,31</sup>, downsampling all replicate experiments to 20 million  
352 reads to control for total read-depth (Table S4), and compared the genome-wide binding  
353 profiles of the control and variant experiments. As an additional control, we used a  
354 standard CETCh-seq experiment on ZMYM3 (ZMYM3<sup>CETCh</sup>) in HepG2 cells to establish  
355 baseline genome-wide occupancy of the wild-type ZMYM3 protein without a super-exon  
356 or missense variant (ENCODE dataset ENCSR505DVB).

357       When comparing ZMYM3<sup>R1274W</sup>-control (i.e. super-exon with reference sequence  
358 at the variant position) to ZMYM3<sup>R1274W</sup>-variant, we observed a large difference in the  
359 number of peaks called between the experiments, with the control experiment yielding  
360 16,214 peaks and the variant only 3,699 peaks (Table S4). Among the variant peaks,  
361 2,508 (67.8%) were also called in the control experiment. We know from extensive  
362 previous ChIP-seq analyses that many loci exhibit read-depth levels near (above or  
363 below) peak-calling thresholds, resulting in situations where experiments are more  
364 similar than they appear when only considering peak-call overlaps. Thus, we performed  
365 additional, more quantitative comparisons, including read-depth correlations and  
366 overlaps of peak-calls using both standard and relaxed thresholds; these analyses

367 consistently show a large, global reduction of occupancy for R1274W variant  
368 experiments (see Supplemental Materials and Methods). The large disparity between  
369 the control and variant ZMYM3<sup>R1274W</sup> experiments was also observed in a differential  
370 analysis using the R package *csaw*<sup>25</sup>. Rather than relying on peak calls, *csaw* performs  
371 a sliding window analysis to detect regions that show differing levels of read-depth  
372 between the experiments. Using the two replicates of ZMYM3<sup>R1274W</sup>-control and the two  
373 replicates of ZMYM3<sup>R1274W</sup>-variant, *csaw* identified 25,845 genomic regions with  
374 sufficient reads for analysis. Of these regions, 13,225 showed differential associations  
375 between control and variant at FDR < 0.05. All but 19 (99.9%) of these sites had higher  
376 read counts in the control than in the variant. We also intersected the 25,845 *csaw*  
377 regions with the union of peak calls between control and variant experiments  
378 (n=17,405), resulting in 11,259 genomic regions; of these, 4,625 were not differential at  
379 FDR < 0.05, while 6,631 were significantly higher in control than in variant, and only  
380 three were significantly higher in variant than in control (Figure 4A). We performed the  
381 *csaw*/peak overlap analyses between ZMYM3<sup>CETCh</sup> and the R1274W variant and control  
382 experiments and observed that ZMYM3<sup>CETCh</sup> and ZMYM3<sup>R1274W</sup>-control had very similar  
383 genomic association patterns, while ZMYM3<sup>R1274W</sup>-variant comprised only a small  
384 minority of ZMYM3<sup>CETCh</sup> sites (Figure S7).

385 We similarly analyzed the ZMYM3<sup>R688H</sup>-control and ZMYM3<sup>R688H</sup>-variant  
386 experiments. Global correlation analyses indicated a high degree of similarity of  
387 genomic occupancy between the control and variant experiments (Supplemental  
388 Materials and Methods). Analysis of *csaw* regions intersected with peak calls gave  
389 6,416 genomic sites, none of which were significantly different (FDR < 0.05) between



390 control and variant (Figure 4B). Pairwise Pearson correlation coefficients of read counts  
391 of each of the two replicates of control and variant ranged from 0.71 to 0.84, indicating a  
392 high degree of overall similarity (Figure S8). However, both control and variant R688H  
393 experiments yielded less binding and fewer peaks than both ZMYM3<sup>R1274W</sup>-control and  
394 ZMYM3<sup>CETCh</sup> experiments (Figure S7). We hypothesize that the super-exon edit itself is  
395 affecting the ZMYM3<sup>R688H</sup> function. Importantly, we find no substantial difference  
396 between control and variant function, supporting the hypothesis that R688H is a likely  
397 benign variant.  
398

## 399 DISCUSSION

400 Here we describe 22 NDD-affected individuals with protein-altering variation in  
401 *ZMYM3*. While four of these variants arose *de novo*, most were present in males in a  
402 hemizygous state and inherited from unaffected or mildly affected heterozygous  
403 mothers. All variants presented here are rare and predicted to be deleterious. Many of  
404 the variants are predicted to interfere with protein structure or function. *ZMYM3* is  
405 relatively intolerant to both missense variation (gnomAD missense Z=4.31) and loss-of-  
406 function variation (RVIS=8.46<sup>32</sup>, pLOEUF=0.11<sup>9</sup>), further supporting the potential for the  
407 variants observed here to have phenotypic effects, and suggesting that the gene is  
408 likely dosage sensitive. Using ChIP-seq, we have also provided functional analyses  
409 showing that one deleterious variant, R1274W, acts as a hypomorphic allele, with  
410 reduced genome occupancy compared to its control and to wild type, and that one likely  
411 benign allele, R688H, has genome occupancy similar to its control experiment.

412 Among the variants in our cohort, there are two sets of alleles affecting the same  
413 codon. At R441, a residue that lies within a zinc finger domain that functions in DNA  
414 binding, we found substitutions (R441Q) in three unrelated males. Three additional  
415 affected males with a distinct allele at this same residue (R441W) in one family have  
416 been previously reported<sup>13</sup>. Overlapping phenotypic features of these six individuals  
417 include developmental delay (mainly speech), nocturnal enuresis, and microcephaly. In  
418 addition, the facial features in these R441 individuals are quite similar. The other  
419 recurrent variant that we observed here is R1294C, observed as *de novo* in a deceased  
420 male and in a female with 97% skewed X-inactivation. R1294C has also been submitted  
421 to ClinVar<sup>33</sup> as a VUS (SCV000297052.2) by a different group than those that identified

422 R1294C variation for this study. We thus believe the ClinVar submission represents a  
423 third, independent R1294C case, although we are unable to confirm this (see  
424 Supplemental Materials and Methods).

425 The biological role of *ZMYM3* is also supportive of disease relevance. *ZMYM3* is  
426 part of a transcriptional corepressor complex that includes HDAC1, RCOR1 and  
427 KDM1A<sup>10,11</sup>. Additional interactors in this complex can include *ZMYM2* and REST.  
428 Variation in two of these five genes has been robustly associated with  
429 neurodevelopmental disorders<sup>34,35</sup>. Additionally, *ZMYM3* has since been shown to  
430 physically interact with *RNASEH2A*; variation in *RNASEH2A* (MIM:606034) has been  
431 associated with Aicairdi-Gouteres Syndrome 4 (AGS4, MIM:610333). Specifically, a  
432 cluster of pathogenic variants found in AGS4 patients have been shown to disrupt  
433 binding of RNaseH to *ZMYM3*<sup>11</sup>. Residues within the PV-rich domain of *ZMYM3*  
434 (specifically 862-943) have been shown to be necessary for this interaction. I932V,  
435 observed in our cohort, lies in this region and may disrupt this interaction.

436 Recently, Connaughton *et al.* demonstrated a connection between loss-of-  
437 function variation in *ZMYM2* (MIM:602221), a paralog of *ZMYM3* with 44% protein-  
438 identity, to congenital anomalies of the kidney and urinary tract, with extra-renal features  
439 or NDD findings (MIM:619522)<sup>34</sup>. This same publication also reported two male  
440 probands who had hemizygous variants of uncertain significance in *ZMYM3*, resulting in  
441 G673D and V866M (Figure 1). Phenotypic overlap of individuals with variation in  
442 *ZMYM2* and *ZMYM3* presented here include developmental delay, microcephaly, and  
443 ID. Some similarity of facial features is also shared with the *ZMYM2* cohort, including  
444 one proband with protuberant ears. In addition to *ZMYM2* and *ZMYM3*, the *ZMYM*-

445 family of proteins includes two additional members, ZMYM4, and QRICH1. Variation in  
446 *QRICH1* (MIM:617387) has been associated with Ververi-Brady syndrome  
447 (MIM:617387), which has features including developmental delay, intellectual disability,  
448 non-specific facial dysmorphism, and hypotonia among others<sup>36</sup>.

449 Variants observed in this cohort lie across the length of the protein, and modeling  
450 data suggest that while several may affect protein structure, several also likely affect  
451 protein-interactions, which are key in the biological function of ZMYM3. ChIP-seq data  
452 for ZMYM3<sup>R1274W</sup> indicate a large reduction in genome-wide occupancy, even though  
453 the variant is not within any direct DNA-binding domains. Leung *et al.* have previously  
454 shown that this specific residue is necessary for interaction with RAP80, a ubiquitin-  
455 binding protein that plays a role in the DNA damage response<sup>37</sup>. While the observed  
456 widespread reduction in genomic occupancy indicates a global hypomorphic effect,  
457 individual binding event differences may be of particular interest. For example, one of  
458 the most significant differential binding events, as determined by *csaw*, occurs at a  
459 regulatory element on chromosome 8 (Figure 4C); this region is annotated as a distal  
460 enhancer by the ENCODE Consortium<sup>38</sup>, and, according to Activity-by-Contact (ABC)  
461 analysis<sup>39</sup>, this region connects to and is likely a regulatory element for the gene  
462 *EFR3A*. Pathogenic variants in *EFR3A* have been associated with autism spectrum  
463 disorders<sup>40</sup>, with phenotypes that overlap those described here.

464 A key limitation of this study is the X-linked nature of *ZMYM3*, and the fact that  
465 most of the variants observed here are inherited, which makes the statistical evaluation  
466 of pathogenicity difficult. We cannot, for example, use *de novo* variant enrichment  
467 testing, a powerful means of inferring pathogenicity for dominant NDDs<sup>41</sup>. Traditional

468 association or burden testing also cannot be done given the absence of systematically  
469 ascertained and matched cases and controls. However, this is a common limitation of  
470 establishing X-linked recessive disease in males. Additionally, while many pedigrees  
471 suggest that testing in other family members may be informative for each individual  
472 variant's interpretation (Figure S1), we were unable to test all siblings and relatives. This  
473 additional information may be particularly useful for flagging any potential benign  
474 variants within these families (i.e., those present in unaffected male relatives, such as  
475 was observed for R688H). X-chromosome inactivation studies in carrier females may  
476 also be informative.

477         Despite the above limitations, the totality of the evidence presented here is  
478 strong. The presence of recurrent variation, overlapping phenotypic features, protein-  
479 modeling data, evolutionary constraint, and experimentally-confirmed functional effects  
480 strongly support *ZMYM3* as a novel NDD gene. While additional analyses are  
481 necessary to ultimately confirm these findings and adjudicate the pathogenicity of each  
482 individual variant, we provide substantial evidence that *ZMYM3* is likely to be a novel  
483 NDD-associated gene.

484

485 **Declaration of interests.**

486 JLB, YC, BRL, AGN and HZE are employees of GeneDx, LLC. SEA is a cofounder and  
487 CEO of MediGenome, the Swiss Institute of Genomic Medicine. All other authors  
488 declare no competing interests.

489

490 **Acknowledgements**

491 We sincerely thank all the families who participated in this study.

492 SMH, AC, ACEH, MD and GMC were supported by a grant from the Alabama Genomic  
493 Health Initiative (an Alabama-State earmarked project F170303004) through the  
494 University of Alabama in Birmingham. LN was supported by the project National  
495 Institute for Neurological Research (Programme EXCELES, ID Project No.  
496 LX22NPO5107), Funded by the European Union, Next Generation EU and by  
497 institutional program UNCE/MED/007 of Charles University in Prague. SK was  
498 supported by grant NV19-07-00136 from the Ministry of Health of the Czech Republic.  
499 LN and SK thank the National Center for Medical Genomics (LM2018132) for WES  
500 analyses. Sequencing and analysis of one individual in this study was made possible by  
501 the generous gifts to Children's Mercy Research Institute and Genomic Answers for  
502 Kids program at Children's Mercy Kansas City. This work was also supported by the  
503 Italian Ministry of Health (Ricerca 5x1000, RCR-2020-23670068\_001, and RCR-2021-  
504 23671215 to MT), and Italian Ministry of Research (FOE 2019, to MT), and PRIN2020  
505 (code 20203P8C3X, to AB). Reanalysis of exome sequencing for individual 14 was  
506 performed on a research basis by the Care4Rare Canada Consortium. This work was  
507 supported by grants from the Swiss National Science Foundation (31003A\_182632 to

508 AR) and the Blackswan Foundation (to AR), and the ChildCare Foundation to SEA. This  
509 work was also funded through the CRT Foundation (Progam "Erogazioni Ordinarie"  
510 2019) and the Italian Ministry of University and Research (Assegni, Tornata 2022,  
511 Bando: BMSS.2022.06/XXIV), to MRS, GC and GE. MM was supported by RVO VFN  
512 64165, Czech Ministry of Health. This work was also supported by a Swiss National  
513 Science Foundation grant 320030\_179547 to AR. CN and JD were supported by The  
514 Genesis Foundation for Children.

515

516

517

#### 518 **Data and code availability**

519 The published article includes all variant information pertinent to this study. ChIP-seq  
520 data will be made available via the NCBI Gene Expression Omnibus (GEO,  
521 <https://www.ncbi.nlm.nih.gov/geo/>).

522

523

524



## 525 **References**

- 526 1. Ropers, H.H. (2008). Genetics of intellectual disability. *Curr Opin Genet Dev* 18, 241–  
527 250.
- 528 2. Cooper, G.M., Coe, B.P., Girirajan, S., Rosenfeld, J.A., Vu, T.H., Baker, C., Williams,  
529 C., Stalker, H., Hamid, R., Hannig, V., et al. (2011). A copy number variation morbidity  
530 map of developmental delay. *Nat. Genet.* 43, 838–846.
- 531 3. Neu, M.B., Bowling, K.M., and Cooper, G.M. (2019). Clinical utility of genomic  
532 sequencing. *Curr. Opin. Pediatr.* 31, 732–738.
- 533 4. Bamshad, M.J., Nickerson, D.A., and Chong, J.X. (2019). Mendelian Gene  
534 Discovery: Fast and Furious with No End in Sight. *Am. J. Hum. Genet.* 105, 448–455.
- 535 5. Martin, H.C., Gardner, E.J., Samocha, K.E., Kaplanis, J., Akawi, N., Sifrim, A.,  
536 Eberhardt, R.Y., Tavares, A.L.T., Neville, M.D.C., Niemi, M.E.K., et al. (2021). The  
537 contribution of X-linked coding variation to severe developmental disorders. *Nat.*  
538 *Commun.* 12,.
- 539 6. Piton, A., Redin, C., and Mandel, J.L. (2013). XLID-causing mutations and associated  
540 genes challenged in light of data from large-scale human exome sequencing. *Am. J.*  
541 *Hum. Genet.*
- 542 7. Migeon, B.R. (2020). X-linked diseases: susceptible females. *Genet. Med.* 2020 227  
543 22, 1156–1174.
- 544 8. Deciphering Developmental Disorders, S. (2015). Large-scale discovery of novel  
545 genetic causes of developmental disorders. *Nature* 519, 223–228.
- 546 9. Lek, M., Karczewski, K.J., Minikel, E. V, Samocha, K.E., Banks, E., Fennell, T.,  
547 O'Donnell-Luria, A.H., Ware, J.S., Hill, A.J., Cummings, B.B., et al. (2016). Analysis of

- 548 protein-coding genetic variation in 60,706 humans. *Nature* 536, 285–291.
- 549 10. Hakimi, M.-A., Dong, Y., Lane, W.S., Speicher, D.W., and Shiekhattar, R. (2003). A  
550 Candidate X-linked Mental Retardation Gene Is a Component of a New Family of  
551 Histone Deacetylase-containing Complexes. *J. Biol. Chem.* 278, 7234–7239.
- 552 11. Shapson-Coe, A., Valeiras, B., Wall, C., and Rada, C. (2019). Aicardi-Goutières  
553 Syndrome associated mutations of RNase H2B impair its interaction with ZMYM3 and  
554 the CoREST histone-modifying complex. *PLoS One* 14,.
- 555 12. van der Maarel, S.M., Scholten, I.H., Huber, I., Philippe, C., Suijkerbuijk, R.F.,  
556 Gilgenkrantz, S., Kere, J., Cremers, F.P., and Ropers, H.H. (1996). Cloning and  
557 characterization of DXS6673E, a candidate gene for X-linked mental retardation in  
558 Xq13.1. *Hum. Mol. Genet.* 5, 887–897.
- 559 13. Philips, A.K., Sirén, A., Avela, K., Somer, M., Peippo, M., Ahvenainen, M., Doagu,  
560 F., Arvio, M., Kääriäinen, H., Van Esch, H., et al. (2014). X-exome sequencing in  
561 Finnish families with Intellectual Disability - Four novel mutations and two novel  
562 syndromic phenotypes. *Orphanet J. Rare Dis.*
- 563 14. Boycott, K.M., Azzariti, D.R., Hamosh, A., and Rehm, H.L. (2022). Seven years  
564 since the launch of the Matchmaker Exchange: The evolution of genomic matchmaking.  
565 *Hum. Mutat.* 43, 659–667.
- 566 15. Hamosh, A., Wohler, E., Martin, R., Griffith, S., Rodrigues, E. da S., Antonescu, C.,  
567 Doheny, K.F., Valle, D., and Sobreira, N. (2022). The impact of GeneMatcher on  
568 international data sharing and collaboration. *Hum. Mutat.* 43, 668–673.
- 569 16. Osmond, M., Hartley, T., Johnstone, B., Andjic, S., Girdea, M., Gillespie, M., Buske,  
570 O., Dumitriu, S., Koltunova, V., Ramani, A., et al. (2022). PhenomeCentral: 7 years of

- 571 rare disease matchmaking. *Hum. Mutat.* 43, 674–681.
- 572 17. Jumper, J., Evans, R., Pritzel, A., Green, T., Figurnov, M., Ronneberger, O.,  
573 Tunyasuvunakool, K., Bates, R., Žídek, A., Potapenko, A., et al. (2021). Highly accurate  
574 protein structure prediction with AlphaFold. *Nature* 596, 583–589.
- 575 18. Pettersen, E.F., Goddard, T.D., Huang, C.C., Couch, G.S., Greenblatt, D.M., Meng,  
576 E.C., and Ferrin, T.E. (2004). UCSF Chimera--a visualization system for exploratory  
577 research and analysis. *J. Comput. Chem.* 25, 1605–1612.
- 578 19. Rossi Sebastiano, M., Ermondi, G., Hadano, S., and Caron, G. (2022). AI-based  
579 protein structure databases have the potential to accelerate rare diseases research:  
580 AlphaFoldDB and the case of IAHSF/Alsin. *Drug Discov. Today* 27, 1652–1660.
- 581 20. Savic, D., Partridge, E.C., Newberry, K.M., Smith, S.B., Meadows, S.K., Roberts,  
582 B.S., Mackiewicz, M., Mendenhall, E.M., and Myers, R.M. (2015). CETCh-seq: CRISPR  
583 epitope tagging ChIP-seq of DNA-binding proteins. *Genome Res.* 25, 1581.
- 584 21. Meadows, S.K., Brandsmeier, L.A., Newberry, K.M., Betti, M.J., Nesmith, A.S.,  
585 Mackiewicz, M., Partridge, E.C., Mendenhall, E.M., and Myers, R.M. (2020). Epitope  
586 tagging ChIP-seq of DNA binding proteins using CETCh-seq. *Methods Mol. Biol.* 2117,  
587 3–34.
- 588 22. Kharchenko, P. V., Tolstorukov, M.Y., and Park, P.J. (2008). Design and analysis of  
589 ChIP-seq experiments for DNA-binding proteins. *Nat. Biotechnol.* 2008 2612 26, 1351–  
590 1359.
- 591 23. Li, Q., Brown, J.B., Huang, H., and Bickel, P.J. (2011). Measuring reproducibility of  
592 high-throughput experiments. <https://doi.org/10.1214/11-AOAS466> 5, 1752–1779.
- 593 24. Landt, S.G., Marinov, G.K., Kundaje, A., Kheradpour, P., Pauli, F., Batzoglou, S.,

- 594 Bernstein, B.E., Bickel, P., Brown, J.B., Cayting, P., et al. (2012). ChIP-seq guidelines  
595 and practices of the ENCODE and modENCODE consortia. *Genome Res.* 22, 1813–  
596 1831.
- 597 25. Lun, A.T.L., and Smyth, G.K. (2016). csaw: a Bioconductor package for differential  
598 binding analysis of ChIP-seq data using sliding windows. *Nucleic Acids Res.* 44, e45.
- 599 26. Kircher, M., Witten, D.M., Jain, P., O’Roak, B.J., Cooper, G.M., and Shendure, J.  
600 (2014). A general framework for estimating the relative pathogenicity of human genetic  
601 variants. *Nat Genet* 46, 310–315.
- 602 27. Bertelsen, B., Tümer, Z., and Ravn, K. (2011). Three new loci for determining x  
603 chromosome inactivation patterns. *J. Mol. Diagn.* 13, 537–540.
- 604 28. Machado, F.B., Machado, F.B., Faria, M.A., Lovatel, V.L., Alves Da Silva, A.F.,  
605 Radic, C.P., De Brasi, C.D., Rios, Á.F.L., Chuva De Sousa Lopes, S.M., Serafim Da  
606 Silveira, L., et al. (2014). 5meCpG epigenetic marks neighboring a primate-conserved  
607 core promoter short tandem repeat indicate X-chromosome inactivation. *PLoS One* 9,.
- 608 29. Mariani, V., Biasini, M., Barbato, A., and Schwede, T. (2013). IDDT: a local  
609 superposition-free score for comparing protein structures and models using distance  
610 difference tests. *Bioinformatics* 29, 2722–2728.
- 611 30. Kumar, M., Michael, S., Alvarado-Valverde, J., McRossed D Sign@száros, B.,  
612 Sámano-Sánchez, H., Zeke, A., Dobson, L., Lazar, T., Örd, M., Nagpal, A., et al. (2022).  
613 The Eukaryotic Linear Motif resource: 2022 release. *Nucleic Acids Res.* 50, D497–  
614 D508.
- 615 31. Johnson, D.S., Mortazavi, A., Myers, R.M., and Wold, B. (2007). Genome-wide  
616 mapping of in vivo protein-DNA interactions. *Science* (80-. ). 316, 1497–1502.

- 617 32. Petrovski, S., Wang, Q., Heinzen, E.L., Allen, A.S., and Goldstein, D.B. (2013).  
618 Genic intolerance to functional variation and the interpretation of personal genomes.  
619 PLoS Genet 9, e1003709.
- 620 33. Landrum, M.J., Lee, J.M., Benson, M., Brown, G., Chao, C., Chitipiralla, S., Gu, B.,  
621 Hart, J., Hoffman, D., Hoover, J., et al. (2016). ClinVar: public archive of interpretations  
622 of clinically relevant variants. *Nucleic Acids Res* 44, D862-8.
- 623 34. Connaughton, D.M., Dai, R., Owen, D.J., Marquez, J., Mann, N., Graham-Paquin,  
624 A.L., Nakayama, M., Coyaud, E., Laurent, E.M.N., St-Germain, J.R., et al. (2020).  
625 Mutations of the Transcriptional Corepressor ZMYM2 Cause Syndromic Urinary Tract  
626 Malformations. *Am. J. Hum. Genet.* 107, 727–742.
- 627 35. Chong, J.X., Yu, J.H., Lorentzen, P., Park, K.M., Jamal, S.M., Tabor, H.K., Rauch,  
628 A., Saenz, M.S., Boltshauser, E., Patterson, K.E., et al. (2016). Gene discovery for  
629 Mendelian conditions via social networking: de novo variants in KDM1A cause  
630 developmental delay and distinctive facial features. *Genet. Med.* 18, 788–795.
- 631 36. Kumble, S., Levy, A.M., Punetha, J., Gao, H., Ah Mew, N., Anyane-Yeboah, K.,  
632 Benke, P.J., Berger, S.M., Bjerglund, L., Campos-Xavier, B., et al. (2022). The clinical  
633 and molecular spectrum of QRI1 associated neurodevelopmental disorder. *Hum.*  
634 *Mutat.* 43, 266–282.
- 635 37. Leung, J.W.C., Makharashvili, N., Agarwal, P., Chiu, L.-Y., Pourpre, R., Cammarata,  
636 M.B., Cannon, J.R., Sherker, A., Durocher, D., Brodbelt, J.S., et al. (2017). ZMYM3  
637 regulates BRCA1 localization at damaged chromatin to promote DNA repair. *Genes*  
638 *Dev.* 31, 260–274.
- 639 38. Dunham, I., Kundaje, A., Aldred, S.F., Collins, P.J., Davis, C.A., Doyle, F., Epstein,

640 C.B., Fietze, S., Harrow, J., Kaul, R., et al. (2012). An integrated encyclopedia of DNA  
641 elements in the human genome. *Nature* 489, 57–74.

642 39. Nasser, J., Bergman, D.T., Fulco, C.P., Guckelberger, P., Doughty, B.R.,  
643 Patwardhan, T.A., Jones, T.R., Nguyen, T.H., Ulirsch, J.C., Lekschas, F., et al. (2021).  
644 Genome-wide enhancer maps link risk variants to disease genes. *Nature* 593, 238–243.

645 40. Gupta, A.R., Pirruccello, M., Cheng, F., Kang, H.J., Fernandez, T. V., Baskin, J.M.,  
646 Choi, M., Liu, L., Ercan-Sencicek, A.G., Murdoch, J.D., et al. (2014). Rare deleterious  
647 mutations of the gene EFR3A in autism spectrum disorders. *Mol. Autism* 5.

648 41. Samocha, K.E., Robinson, E.B., Sanders, S.J., Stevens, C., Sabo, A., McGrath,  
649 L.M., Kosmicki, J.A., Rehnstrom, K., Mallick, S., Kirby, A., et al. (2014). A framework for  
650 the interpretation of de novo mutation in human disease. *Nat Genet* 46, 944–950.

651

652

653

654

655 **Figure Legends**

656 **Figure 1. Observed variation along the length of the ZMYM3 protein.** The 1370 aa  
657 ZMYM3 protein (Q14202, NP\_005087.1) is annotated with MYM-type zinc fingers (1-9,  
658 orange), a Proline-Valine Rich region (PV Rich, red), and Cre-like domain (blue) as  
659 described by UniProt. **A.** Hemizygous variants observed in males in this study are noted  
660 above the protein model, with *de novo* variants in red. (a) Note that R441Q was  
661 observed in three unrelated males. Hemizygous variants that were previously reported  
662 in males are shown below the protein (from PMID: 32891193, PMID: 24721225). **B.**  
663 Maternally-inherited (black) or *de novo* (red) heterozygous variants observed in females  
664 in this study are noted above the protein model.

665 **Figure 2. Facial features of a subset of individuals with ZMYM3 variation.**

666 Individual ID and protein effect are noted for each. Note deep-set eyes, long palpebral  
667 fissures, large/prominent/cupped ears, and tall forehead.

668 **Figure 3. Missense variants in ZMYM3 mainly lie in ordered regions.** Three  
669 disordered regions (red line) were identified (aa 1-72, 90-301, and 759-830), while the  
670 remainder of the protein is predicted to be structured (green line). AlphaFold produces a  
671 per-residue confidence score (predicted Local Distance Difference Test, pLDDT)  
672 between 0 and 100, which is plotted along the length of the ZMYM3 protein. Horizontal  
673 bars and shading indicate confidence ranges for pLDDT scores. Missense variants  
674 observed here are noted on the graph, and while residues 69, 241, and 302 lie in  
675 disordered regions, the remainder of residues lie in structured regions.

676 **Figure 4. R1274W is a hypomorphic allele, while R688H has similar genome**  
677 **occupancy to that of wild type. A, B.** Genomic regions called by csaw between



678 experiments, then overlapped with IDR 0.05 peaks called in either experiment. Yellow  
679 color indicates regions determined by csaw to have significantly higher differential  
680 binding (at FDR < 0.05) in control, orange indicates regions with no differential binding,  
681 and red indicates regions with higher differential binding in variant. For R1274W (**A**),  
682 there are 6,631 regions with higher binding in control, 4,625 regions with no differential  
683 binding, and 3 regions with higher binding in variant. For R688H (**B**), all 6,416 regions  
684 had no differential binding. **C.** Genome browser track for ZMYM3-R1274W-variant ChIP-  
685 seq experiments. Human genome (hg38) chr8:131,561,953-131,925,404 is displayed.  
686 Top track is Activity-by-Contact ("ABC loops") showing predicted interaction between  
687 enhancer element on left and TSS for the gene *EFR3A* on right. "Genes" track is  
688 RefSeq gene model. "Control Rep 1" and "Control Rep 2" are aligned bam reads from  
689 ZMYM3-R1274W-control experiments, "Variant Rep 1" and "Variant Rep 2" are aligned  
690 bam reads from ZMYM3-R1274W-variant experiments. All bam files are downsampled  
691 to an equal number of reads in each replicate, and all four replicate tracks are scaled  
692 from 0-60 vertically. "ENCODE" tracks are shown below the ChIP-seq tracks: "cCREs"  
693 represent candidate cis-regulatory elements colored by ENCODE standards,  
694 "H3K27Ac" is layered H3K27Ac signal from seven ENCODE cell lines, and "TFBSs" are  
695 ENCODE TF clusters (340 factors, 129 cell types). The putative enhancer element  
696 identified as the most significant loss of binding in the variant experiment is highlighted  
697 in yellow, showing the ENCODE distal enhancer cCRE call, the ABC loop to the TSS of  
698 *EFR3A*, and the difference in binding with the two control replicates showing strong  
699 signal and the two variant replicates showing substantially less binding. **D.** Protein  
700 modeling of R1274 and R1274W.

Table 1. Individual variant and phenotypic data for the entire cohort.

| Individual | Gender | Zygosity                 | Inheritance    | Mother's Phenotype | Variant (NP_005087.1) | Speech Delay | Motor Delay | ID    | ASD Traits | Behavioral Problems | Facial Dysmorphism | GU Anomalies                                          | Other                                                                                                                     |
|------------|--------|--------------------------|----------------|--------------------|-----------------------|--------------|-------------|-------|------------|---------------------|--------------------|-------------------------------------------------------|---------------------------------------------------------------------------------------------------------------------------|
| 1          | Male   | Hemizygous               | Maternal       | None               | p.(D69N)              | Yes          | Yes         | NA    | NA         | No                  | No                 | Urinary tract dilatation of left kidney on ultrasound | Congenital heart defects                                                                                                  |
| 2          | Male   | Hemizygous               | Maternal       | Hx of LD           | p.(E241K)             | Yes          | Yes         | No    | No         | No                  | Yes                | No                                                    | History of growth hormone resistance and IGF1 deficiency (basis unknown), fasting and heat intolerance, excessive fatigue |
| 3          | Male   | Hemizygous               | Maternal       | None               | p.(R302H)             | Yes          | Yes         | NA    | Yes        | Yes                 | Yes                | Pielonephritis, vesicoureteral reflux                 | GERD                                                                                                                      |
| 4a         | Male   | Hemizygous               | Maternal       | None               | p.(R395S)             | Yes          | Yes         | Yes   | Yes        | Yes                 | Yes                | Hypospadias                                           |                                                                                                                           |
| 4b         | Male   | Hemizygous               | Maternal       | None               | p.(R395S)             | Yes          | No          | Yes   | Yes        | Yes                 | Yes                | No                                                    |                                                                                                                           |
| 5          | Male   | Hemizygous               | Maternal       | None               | p.(P398S)             | Yes          | Yes         | Yes   | Yes        | Yes                 | No                 | No                                                    | Weight <1%ile                                                                                                             |
| 6          | Male   | Hemizygous               | Maternal       | ADHD               | p.(R441Q)             | Yes          | Yes         | Yes   | Yes        | Yes                 | Yes                | Single renal cyst                                     | Constipation                                                                                                              |
| 7          | Male   | Hemizygous               | Maternal       | None               | p.(R441Q)             | Yes          | Yes         | Yes   | Yes        | Yes                 | Yes                | Cryptorchidism, enuresis                              | Short stature                                                                                                             |
| 8          | Male   | Hemizygous               | Maternal       | Hx of LD           | p.(R441Q)             | Yes          | Yes         | Yes   | Yes        | Yes                 | Yes                | Hypospadias, ambiguous genitalia                      | Short stature                                                                                                             |
| 9a         | Male   | Hemizygous               | Maternal       | None               | p.(E731D)             | Yes          | No          | Yes   | Yes        | Yes                 | Yes                | No                                                    |                                                                                                                           |
| 9b         | Male   | Hemizygous               | Maternal       | None               | p.(E731D)             | Yes          | No          | Yes   | Yes        | Yes                 | Yes                | No                                                    |                                                                                                                           |
| 10         | Male   | Hemizygous               | Maternal       | Dyslexia           | p.(I932V)             | Yes          | No          | NA    | NA         | Yes                 | Yes                | No                                                    | GERD, constipation                                                                                                        |
| 11         | Male   | Hemizygous               | Maternal       | None               | p.(R1124Q)            | Yes          | No          | Yes   | No         | Yes                 | Yes                | Ectopic kidney                                        | Short stature, kyphoscoliosis                                                                                             |
| 12         | Male   | Hemizygous               | Maternal       | None               | p.(Y1137N)            | Yes          | Yes         | Yes   | No         | Yes                 | Yes                | No                                                    | Microcephaly                                                                                                              |
| 13         | Male   | Hemizygous               | <i>De novo</i> | None               | p.(V1202D)            | Yes          | Yes         | Yes   | No         | Yes                 | Yes                | Cryptorchidism                                        | Microcephaly, short stature, weight <3%ile, kyphosis, long bone defects, Madelung deformity                               |
| 14         | Male   | Hemizygous               | Unknown        | None               | p.(M1213T)            | Yes          | Yes         | Yes   | No         | No                  | No                 | Enuresis                                              | Microcephaly, scoliosis, reflux                                                                                           |
| 15         | Male   | Hemizygous               | <i>De novo</i> | None               | p.(R1274W)            | Yes          | Yes         | Yes   | Yes        | Yes                 | Yes                | No                                                    | Microcephaly, scoliosis                                                                                                   |
| 16         | Male   | Hemizygous               | <i>De novo</i> | None               | p.(R1294C)            | NA           | NA          | NA    | NA         | NA                  | NA                 | NA                                                    | Deceased                                                                                                                  |
| 17         | Male   | Hemizygous               | Maternal       | None               | p.(M1343I)            | Yes          | Yes         | No    | Yes        | Yes                 | No                 | No                                                    | GI dysmotility, joint laxity, pain & swelling, dysautonomic symptoms                                                      |
| Total      |        |                          |                |                    |                       | 18/18        | 13/18       | 13/15 | 11/16      | 15/18               | 14/18              | 9/18                                                  |                                                                                                                           |
| 18         | Female | Heterozygous, skewed XCI | Maternal       | None               | p.(L226WfsX8)         | Yes          | Yes         | NA    | NA         | No                  | Yes                | No                                                    | GERD                                                                                                                      |
| 19         | Female | Heterozygous             | <i>De novo</i> | None               | p.(Y752C)             | Yes          | Yes         | NA    | NA         | No                  | Yes                | No                                                    |                                                                                                                           |
| 20         | Female | Heterozygous, skewed XCI | <i>De novo</i> | Unknown            | p.(R1294C)            | Yes          | Yes         | NA    | NA         | NA                  | Yes                | Pyelectasis                                           | Volvulus of midgut, pancreatic cysts                                                                                      |
| Total      |        |                          |                |                    |                       | 3/3          | 3/3         |       |            | 0/2                 | 3/3                | 1/3                                                   |                                                                                                                           |

Individuals 4a and 4b are full siblings; Individuals 9a and 9b are full siblings. ID, intellectual disability. ASD, Autism spectrum disorder. GU, Genitourinary. NA, Not assessed. GERD, Gastroesophageal reflux disease. Hx, history. LD, learning disability. ADHD, attention deficit-hyperactivity disorder.

**A**

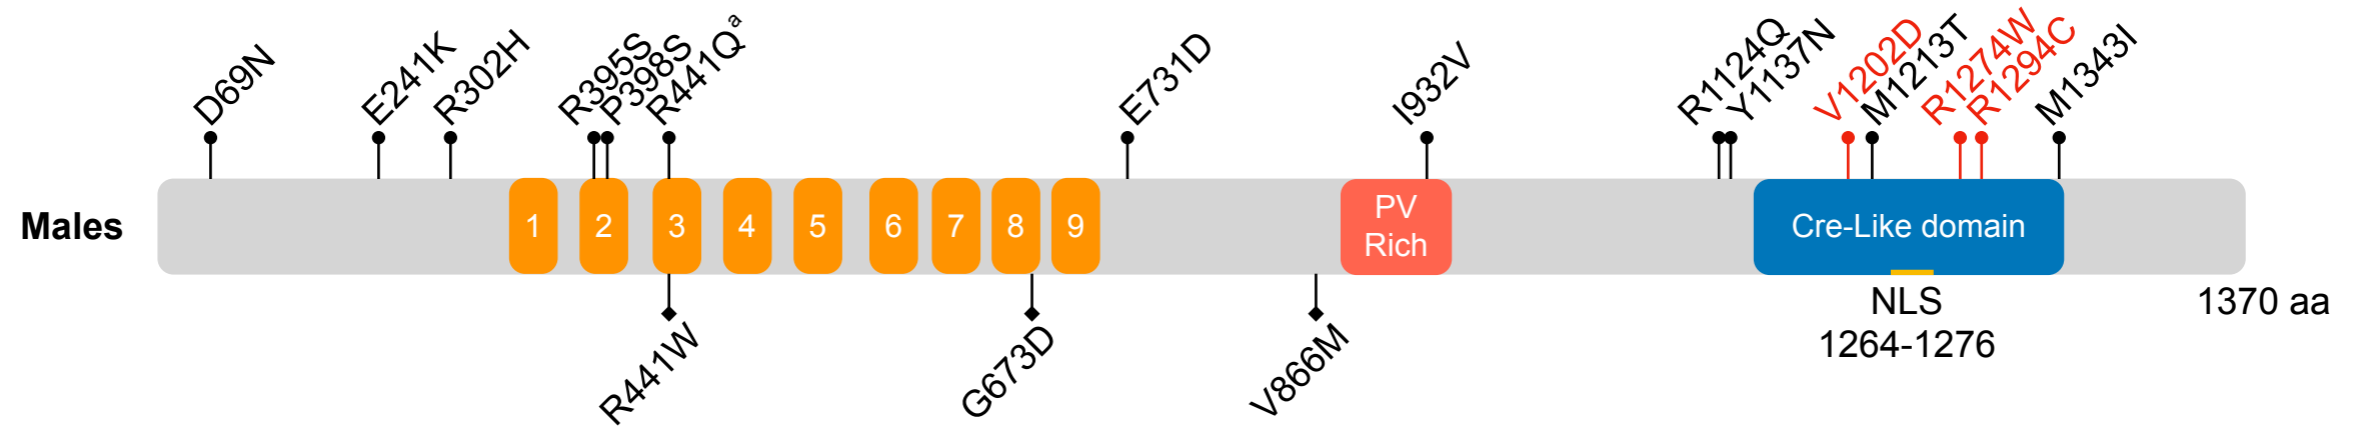

**B**

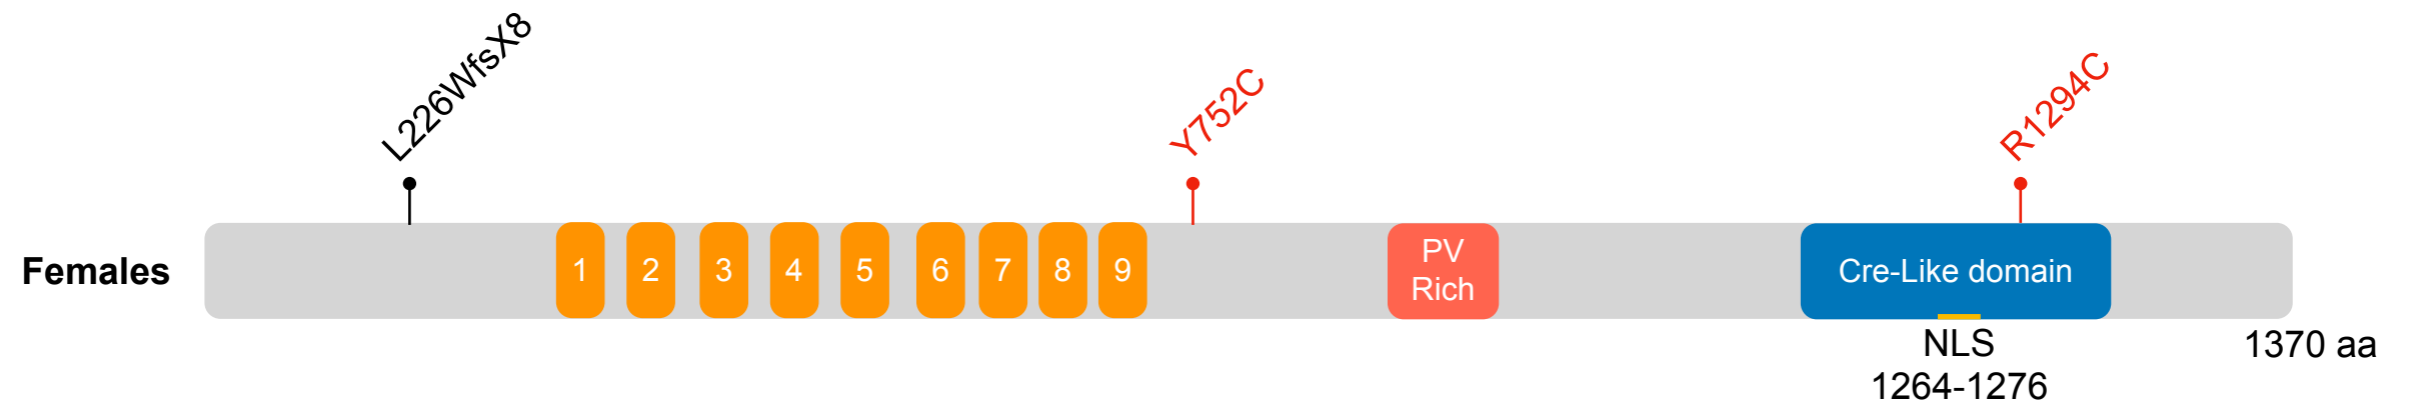

Figure 2 has been removed due to medRxiv photograph policy.

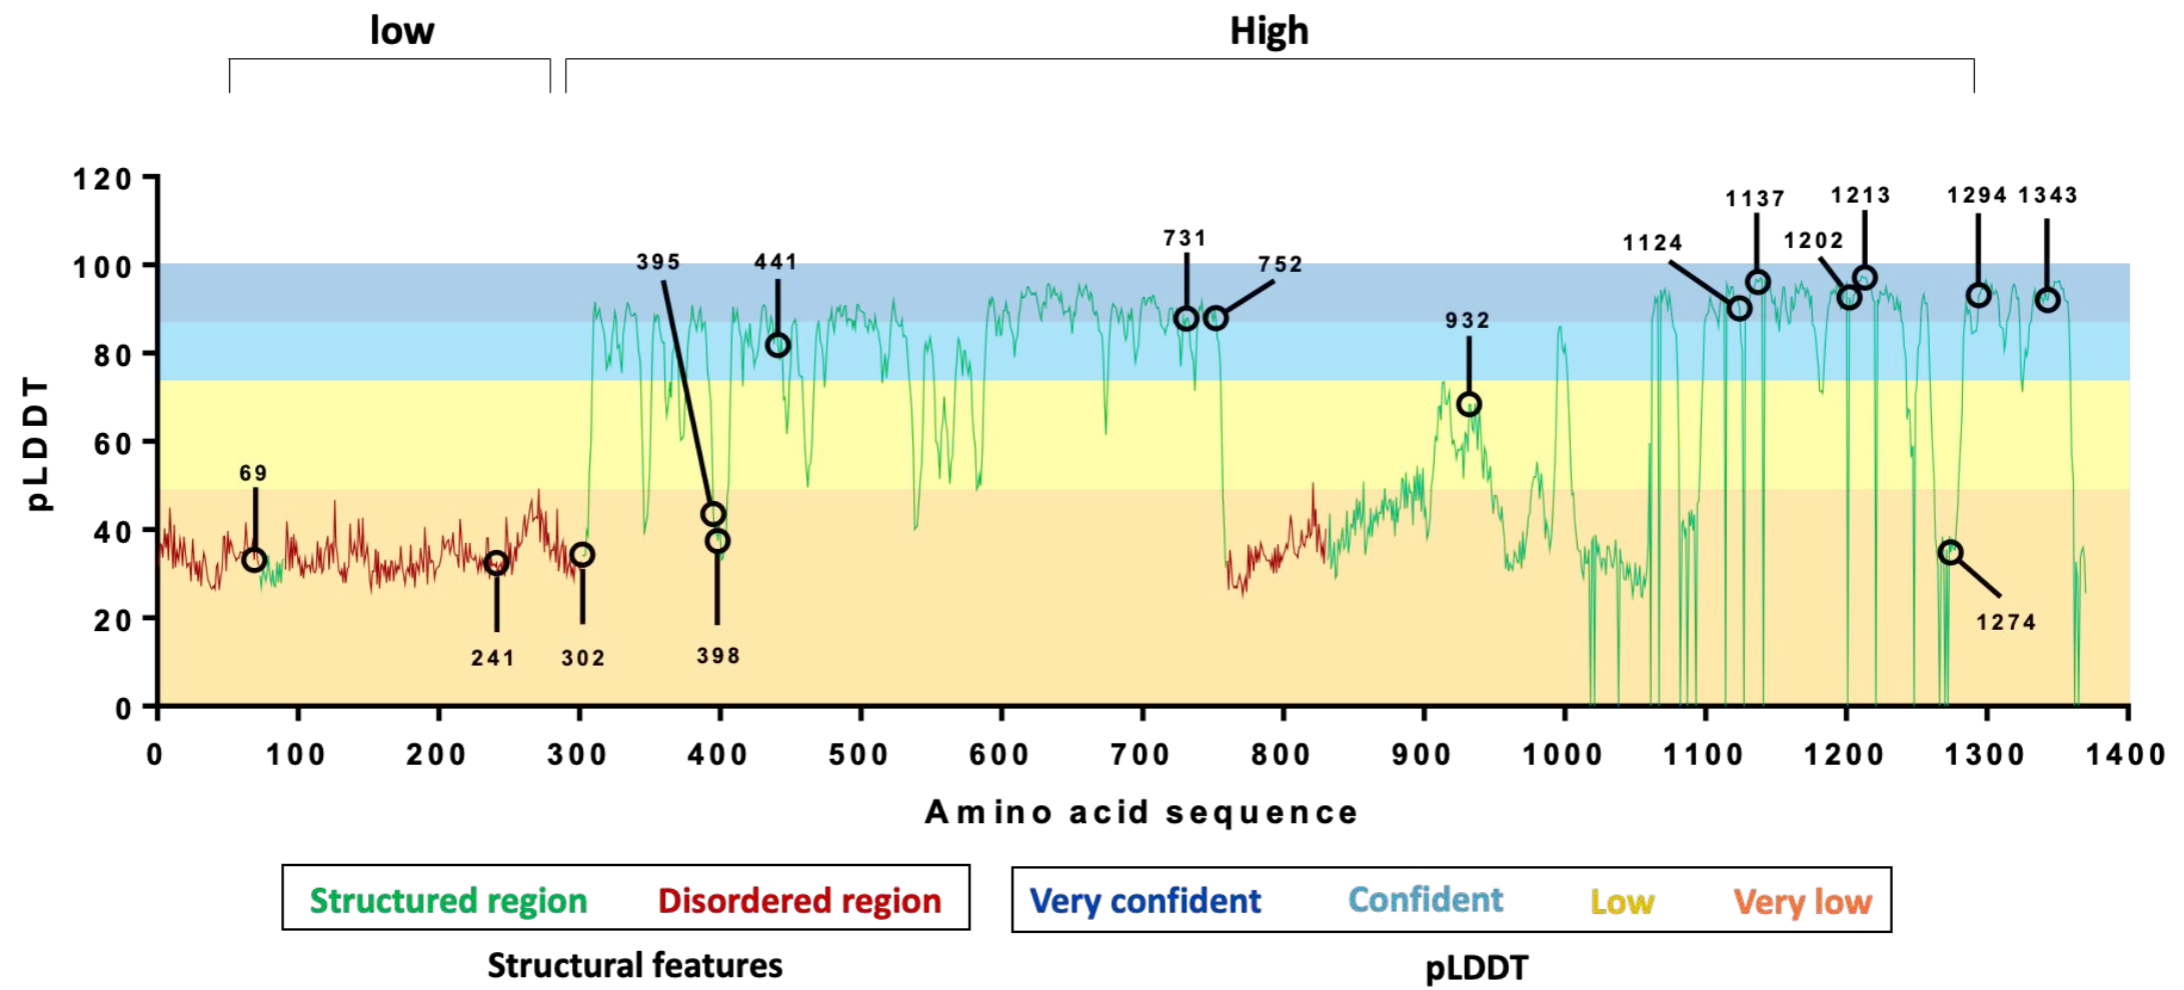

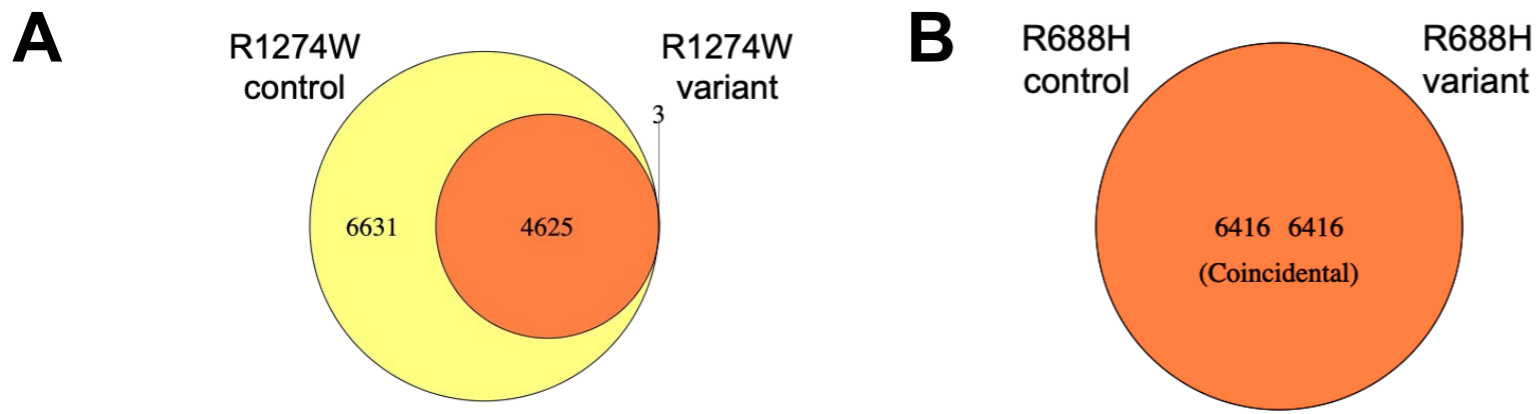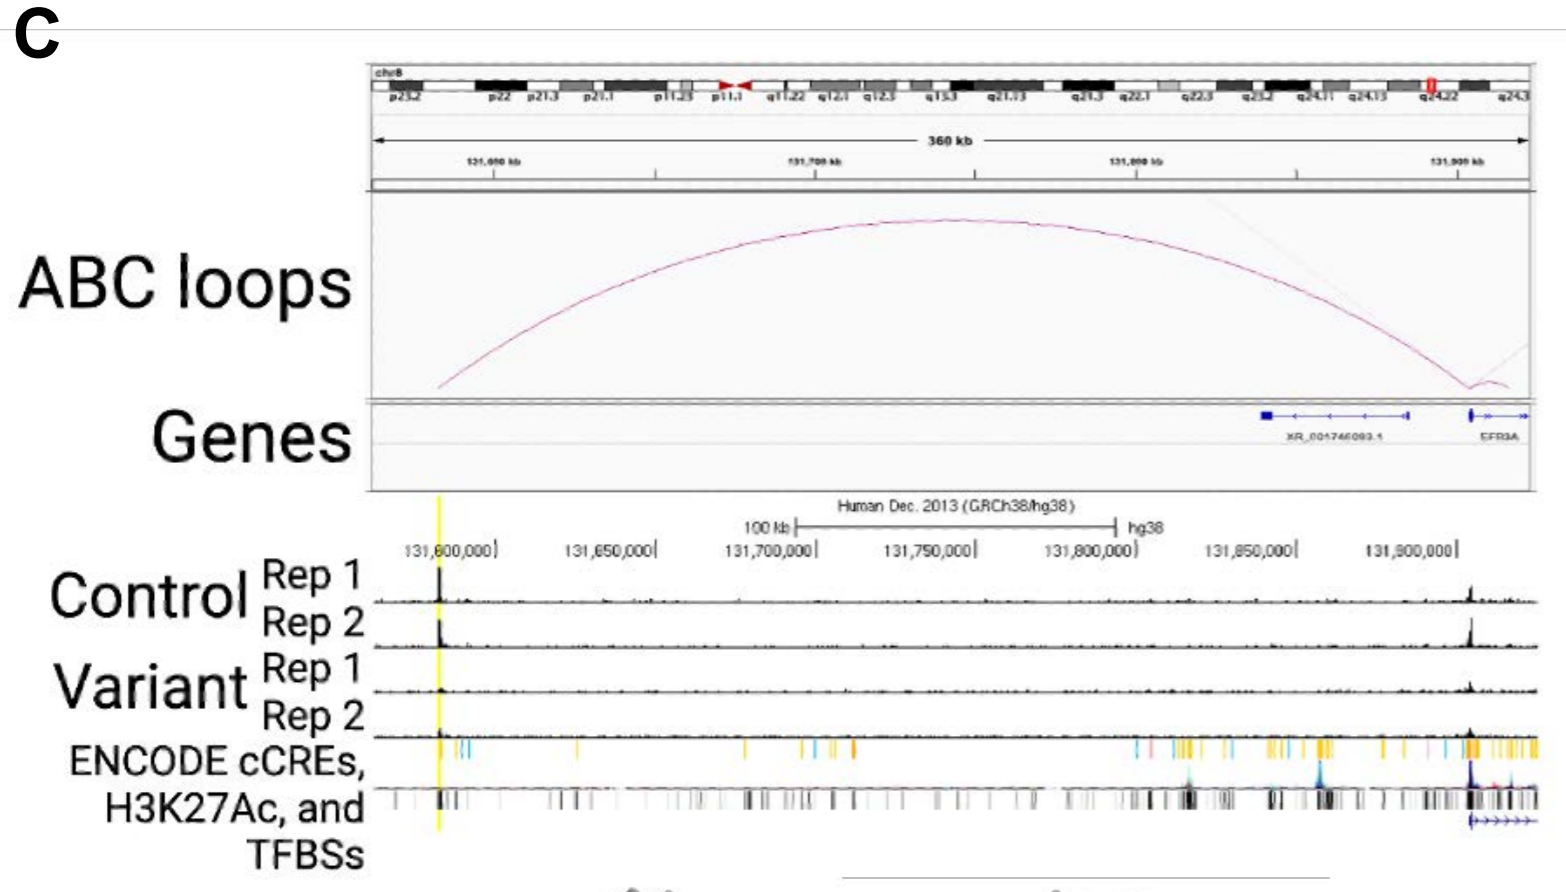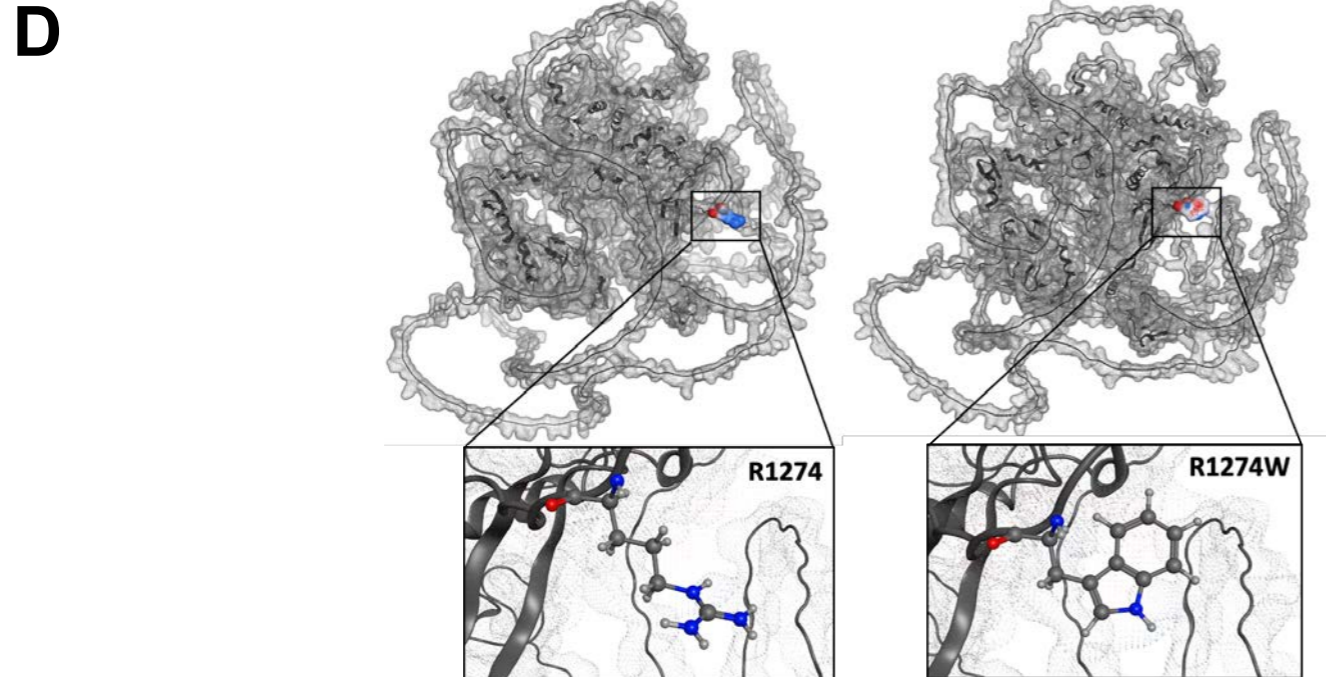

Source: https://medrxiv.org/content/10.1101/2022.09.29.22279724v1.full.pdf
